# Supplementary material for: Dietary Flavonoids, CYP1A1 Genetic Variants, and the Risk of Colorectal Cancer in a Korean population
Source: PubMed Central journal article supplement (PMC5427897; doi:10.1038/s41598-017-00117-8), 2017-03-09
Supplement: 41598_2017_117_MOESM1_ESM.pdf [file 41598_2017_117_MOESM1_ESM.pdf]

# **Dietary Flavonoids, *CYP1A1* Genetic Variants, and the Risk of Colorectal Cancer in a Korean population**

Young Ae Cho<sup>1</sup>, Jeonghee Lee<sup>1</sup>, Jae Hwan Oh<sup>2</sup>, Hee Jin Chang<sup>2</sup>, Dae Kyung Sohn<sup>2</sup>, Aesun Shin<sup>1,3\*</sup> & Jeongseon Kim<sup>1\*</sup>

<sup>1</sup>Molecular Epidemiology Branch, National Cancer Center, Goyang, South Korea. <sup>2</sup>Center for Colorectal Cancer, National Cancer Center Hospital, National Cancer Center, South Korea.

<sup>3</sup>Department of Preventive Medicine, Seoul National University College of Medicine, Seoul, South Korea

\*Corresponding Authors: Jeongseon Kim (e-mail: jskim@ncc.re.kr); Aesun Shin (e-mail: shinaesun@snu.ac.kr)

**Supplementary Table S1. Association between dietary flavonoid intake and the risk of colorectal cancer according to anatomic site.** Multivariable OR was adjusted for age, sex, BMI, education, total caloric intake, family history of colorectal cancer, and regular exercise.

| Dietary flavonoids (mg/day) | No. of Controls (%) | Colon cancer     |                           | Rectal cancer    |                           |
|-----------------------------|---------------------|------------------|---------------------------|------------------|---------------------------|
|                             |                     | No. of Cases (%) | Multivariable OR (95% CI) | No. of Cases (%) | Multivariable OR (95% CI) |
| <i>Total Flavonoids</i>     |                     |                  |                           |                  |                           |
| Q1 (<67.7)                  | 461 (25.0)          | 163 (35.4)       | 1.0 (ref)                 | 172 (38.7)       | 1.0 (ref)                 |
| Q2 (67.7-<98.3)             | 462 (25.0)          | 149 (32.4)       | 0.94 (0.71, 1.24)         | 143 (32.2)       | 0.92 (0.69, 1.22)         |
| Q3 (98.3-<141.7)            | 462 (25.0)          | 112 (24.4)       | 0.70 (0.52, 0.95)         | 96 (21.6)        | 0.63 (0.46, 0.86)         |
| Q4 (≥141.7)                 | 461 (25.0)          | 36 (7.8)         | 0.20 (0.13, 0.31)         | 33 (7.4)         | 0.21 (0.14, 0.32)         |
| <i>P for trend</i>          |                     |                  | < 0.001                   |                  | < 0.001                   |
| <i>Flavonols</i>            |                     |                  |                           |                  |                           |
| Q1 (<13.0)                  | 461 (25.0)          | 160 (34.8)       | 1.0 (ref)                 | 164 (36.9)       | 1.0 (ref)                 |
| Q2 (13.0-<19.2)             | 462 (25.0)          | 182 (39.6)       | 1.11 (0.85, 1.46)         | 170 (28.3)       | 1.06 (0.80, 1.40)         |
| Q3 (19.2-<27.4)             | 462 (25.0)          | 84 (18.3)        | 0.52 (0.38, 0.72)         | 77 (17.3)        | 0.51 (0.37, 0.71)         |
| Q4 (≥27.4)                  | 461 (25.0)          | 34 (7.4)         | 0.18 (0.12, 0.27)         | 33 (7.4)         | 0.19 (0.12, 0.30)         |
| <i>P for trend</i>          |                     |                  | < 0.001                   |                  | < 0.001                   |
| <i>Flavones</i>             |                     |                  |                           |                  |                           |
| Q1 (<0.75)                  | 461 (25.0)          | 101 (22.0)       | 1.0 (ref)                 | 106 (23.9)       | 1.0 (ref)                 |
| Q2 (0.75-<1.12)             | 462 (25.0)          | 144 (31.3)       | 1.47 (1.08, 2.01)         | 155 (34.9)       | 1.55 (1.14, 2.10)         |
| Q3 (1.12-<1.70)             | 462 (25.0)          | 150 (32.6)       | 1.38 (1.02, 1.89)         | 138 (31.1)       | 1.33 (0.97, 1.82)         |
| Q4 (≥1.70)                  | 461 (25.0)          | 65 (14.1)        | 0.56 (0.39, 0.82)         | 45 (10.1)        | 0.42 (0.28, 0.64)         |
| <i>P for trend</i>          |                     |                  | < 0.001                   |                  | < 0.001                   |
| <i>Flavanones</i>           |                     |                  |                           |                  |                           |
| Q1 (<1.16)                  | 462 (25.0)          | 110 (23.9)       | 1.0 (ref)                 | 123 (27.7)       | 1.0 (ref)                 |
| Q2 (1.16-<3.54)             | 461 (25.0)          | 110 (23.9)       | 1.18 (0.86, 1.63)         | 115 (25.9)       | 1.16 (0.84, 1.58)         |
| Q3 (3.54-<8.99)             | 462 (25.0)          | 146 (31.7)       | 1.51 (1.11, 2.05)         | 117 (26.4)       | 1.20 (0.88, 1.64)         |
| Q4 (≥8.99)                  | 461 (25.0)          | 94 (20.4)        | 0.97 (0.69, 1.36)         | 89 (20.1)        | 0.96 (0.68, 1.36)         |
| <i>P for trend</i>          |                     |                  | 0.44                      |                  | 0.50                      |
| <i>Flavan-3-ols</i>         |                     |                  |                           |                  |                           |
| Q1 (5.62)                   | 462 (25.0)          | 163 (35.4)       | 1.0 (ref)                 | 160 (36.0)       | 1.0 (ref)                 |
| Q2 (5.62-<13.19)            | 461 (25.0)          | 137 (29.8)       | 0.88 (0.67, 1.18)         | 128 (28.8)       | 0.90 (0.67, 1.20)         |
| Q3 (13.19-<30.38)           | 462 (25.0)          | 91 (19.8)        | 0.60 (0.44, 0.82)         | 102 (23.0)       | 0.76 (0.56, 1.04)         |
| Q4 (≥30.38)                 | 461 (25.0)          | 69 (15.0)        | 0.52 (0.37, 0.73)         | 54 (12.2)        | 0.47 (0.33, 0.68)         |
| <i>P for trend</i>          |                     |                  | < 0.001                   |                  | < 0.001                   |
| <i>Anthocyanidins</i>       |                     |                  |                           |                  |                           |
| Q1 (<11.4)                  | 461 (25.0)          | 117 (25.4)       | 1.0 (ref)                 | 136 (30.6)       | 1.0 (ref)                 |
| Q2 (11.4-<18.9)             | 462 (25.0)          | 142 (30.9)       | 1.31 (0.97, 1.77)         | 140 (31.5)       | 1.18 (0.88, 1.59)         |
| Q3 (18.9-<29.7)             | 462 (25.0)          | 131 (28.5)       | 1.13 (0.83, 1.53)         | 105 (23.7)       | 0.84 (0.61, 1.14)         |
| Q4 (≥29.7)                  | 461 (25.0)          | 70 (15.2)        | 0.59 (0.41, 0.84)         | 63 (14.2)        | 0.51 (0.36, 0.73)         |
| <i>P for trend</i>          |                     |                  | < 0.001                   |                  | < 0.001                   |
| <i>Isoflavones</i>          |                     |                  |                           |                  |                           |
| Q1 (16.2)                   | 462 (25.0)          | 109 (23.7)       | 1.0 (ref)                 | 109 (24.6)       | 1.0 (ref)                 |
| Q2 (16.2-<26.7)             | 461 (25.0)          | 150 (32.6)       | 1.23 (0.91, 1.67)         | 161 (36.3)       | 1.34 (0.99, 1.81)         |
| Q3 (26.7-<43.0)             | 461 (25.0)          | 128 (27.8)       | 1.10 (0.81, 1.50)         | 104 (23.4)       | 0.94 (0.68, 1.30)         |
| Q4 (≥43.0)                  | 462 (25.0)          | 73 (15.9)        | 0.62 (0.44, 0.88)         | 70 (15.8)        | 0.64 (0.45, 0.91)         |
| <i>P for trend</i>          |                     |                  | 0.001                     |                  | < 0.001                   |

**Supplementary Table S2. Association between dietary flavonoid intake and the risk of colorectal cancer according to sex.** Multivariable OR was adjusted for age, sex, BMI, education, total caloric intake, family history of colorectal cancer, and regular exercise.

| Dietary flavonoids (mg/day) | Men                   |                           | Women                 |                           |
|-----------------------------|-----------------------|---------------------------|-----------------------|---------------------------|
|                             | No. of Controls/cases | Multivariable OR (95% CI) | No. of Controls/cases | Multivariable OR (95% CI) |
| <i>Total Flavonoids</i>     |                       |                           |                       |                           |
| Q1 (<67.7)                  | 364/266               | 1.0 (ref)                 | 97/81                 | 1.0 (ref)                 |
| Q2 (67.7-<98.3)             | 326/204               | 0.94 (0.72, 1.24)         | 136/91                | 0.85 (0.54, 1.33)         |
| Q3 (98.3-<141.7)            | 311/123               | 0.57 (0.42, 0.77)         | 151/89                | 0.88 (0.56, 1.38)         |
| Q4 (≥141.7)                 | 249/32                | 0.20 (0.13, 0.31)         | 212/37                | 0.22 (0.13, 0.37)         |
| <i>P</i> for trend          |                       | < 0.001                   |                       | < 0.001                   |
| <i>Flavonols</i>            |                       |                           |                       |                           |
| Q1 (<13.0)                  | 355/250               | 1.0 (ref)                 | 106/87                | 1.0 (ref)                 |
| Q2 (13.0-<19.2)             | 329/248               | 1.10 (0.84, 1.43)         | 133/107               | 0.96 (0.62, 1.47)         |
| Q3 (19.2-<27.4)             | 312/94                | 0.42 (0.31, 0.59)         | 150/69                | 0.66 (0.42, 1.04)         |
| Q4 (≥27.4)                  | 254/33                | 0.17 (0.11, 0.27)         | 207/35                | 0.21 (0.12, 0.35)         |
| <i>P</i> for trend          |                       | < 0.001                   |                       | < 0.001                   |
| <i>Flavones</i>             |                       |                           |                       |                           |
| Q1 (<0.75)                  | 372/172               | 1.0 (ref)                 | 89/41                 | 1.0 (ref)                 |
| Q2 (0.75-<1.12)             | 354/230               | 1.46 (1.10, 1.95)         | 108/76                | 1.68 (0.99, 2.86)         |
| Q3 (1.12-<1.70)             | 300/165               | 1.16 (0.86, 1.58)         | 162/127               | 1.75 (1.07, 2.86)         |
| Q4 (≥1.70)                  | 224/58                | 0.56 (0.38, 0.82)         | 237/54                | 0.52 (0.31, 0.88)         |
| <i>P</i> for trend          |                       | 0.002                     |                       | < 0.001                   |
| <i>Flavanones</i>           |                       |                           |                       |                           |
| Q1 (<1.16)                  | 382/199               | 1.0 (ref)                 | 80/37                 | 1.0 (ref)                 |
| Q2 (1.16-<3.54)             | 347/170               | 1.15 (0.86, 1.54)         | 114/58                | 1.25 (0.71, 2.21)         |
| Q3 (3.54-<8.99)             | 313/166               | 1.17 (0.87, 1.58)         | 149/106               | 1.84 (1.08, 3.12)         |
| Q4 (≥8.99)                  | 208/90                | 1.11 (0.78, 1.57)         | 253/97                | 0.96 (0.57, 1.60)         |
| <i>P</i> for trend          |                       | 0.65                      |                       | 0.10                      |
| <i>Flavan-3-ols</i>         |                       |                           |                       |                           |
| Q1 (5.62)                   | 367/250               | 1.0 (ref)                 | 95/80                 | 1.0 (ref)                 |
| Q2 (5.62-<13.19)            | 325/176               | 0.84 (0.64, 1.12)         | 136/96                | 0.95 (0.61, 1.49)         |
| Q3 (13.19-<30.38)           | 282/122               | 0.71 (0.52, 0.97)         | 180/74                | 0.57 (0.36, 0.89)         |
| Q4 (≥30.38)                 | 276/77                | 0.55 (0.39, 0.78)         | 185/48                | 0.42 (0.26, 0.69)         |
| <i>P</i> for trend          |                       | < 0.001                   |                       | < 0.001                   |
| <i>Anthocyanidins</i>       |                       |                           |                       |                           |
| Q1 (<11.4)                  | 347/198               | 1.0 (ref)                 | 114/62                | 1.0 (ref)                 |
| Q2 (11.4-<18.9)             | 327/202               | 1.21 (0.90, 1.61)         | 135/84                | 1.15 (0.72, 1.83)         |
| Q3 (18.9-<29.7)             | 317/149               | 0.84 (0.62, 1.14)         | 146/94                | 1.33 (0.84, 2.10)         |
| Q4 (≥29.7)                  | 259/76                | 0.55 (0.38, 0.79)         | 202/58                | 0.54 (0.33, 0.87)         |
| <i>P</i> for trend          |                       | < 0.001                   |                       | 0.002                     |
| <i>Isoflavones</i>          |                       |                           |                       |                           |
| Q1 (16.2)                   | 320/160               | 1.0 (ref)                 | 142/64                | 1.0 (ref)                 |
| Q2 (16.2-<26.7)             | 307/232               | 1.22 (0.90, 1.64)         | 154/90                | 1.33 (0.85, 2.07)         |
| Q3 (26.7-<43.0)             | 313/147               | 0.84 (0.61, 1.15)         | 148/87                | 1.47 (0.94, 2.30)         |
| Q4 (≥43.0)                  | 310/86                | 0.50 (0.35, 0.72)         | 152/57                | 0.87 (0.54, 1.41)         |
| <i>P</i> for trend          |                       | < 0.001                   |                       | 0.34                      |

**Supplementary Table S3. Effects of dietary flavonol intake on the risk of colorectal cancer stratified by *CYP1A1* rs4646903 variants and risk factors.** \*The flavonol intake was categorized into two groups (high/low) based on the median (19.1 mg/day) level of the control group. \*\*Multivariable OR was adjusted for age, sex, BMI, education, total caloric intake, family history of colorectal cancer, and regular exercise.

| Risk Factors             | <i>CYP1A1</i> rs4646903 |         |                             |                    |        |                             | P for interaction |
|--------------------------|-------------------------|---------|-----------------------------|--------------------|--------|-----------------------------|-------------------|
|                          | TT/TC                   |         |                             | CC                 |        |                             |                   |
|                          | No. Controls/Cases      |         | High vs. Low *              | No. Controls/Cases |        | High vs. Low *              |                   |
|                          | Low *                   | High *  | Multivariable OR (95% CI)** | Low *              | High * | Multivariable OR (95% CI)** |                   |
| Age                      |                         |         |                             |                    |        |                             |                   |
| <50 years old            | 157/92                  | 102/41  | 0.76 (0.47, 1.23)           | 31/19              | 24/4   | 0.51 (0.10, 2.54)           | 0.43              |
| ≥50 years old            | 445/347                 | 467/111 | 0.30 (0.22, 0.40)           | 69/69              | 106/14 | 0.12 (0.05, 0.26)           | 0.03              |
| Sex                      |                         |         |                             |                    |        |                             |                   |
| Men                      | 441/316                 | 357/88  | 0.34 (0.25, 0.46)           | 78/65              | 82/9   | 0.14 (0.06, 0.37)           | 0.10              |
| Women                    | 161/123                 | 212/64  | 0.48 (0.32, 0.74)           | 21/23              | 48/9   | 0.17 (0.05, 0.56)           | 0.11              |
| BMI (kg/m <sup>2</sup> ) |                         |         |                             |                    |        |                             |                   |
| <25                      | 404/295                 | 386/105 | 0.38 (0.28, 0.52)           | 70/66              | 74/12  | 0.21 (0.09, 0.44)           | 0.10              |
| ≥25                      | 198/144                 | 183/47  | 0.36 (0.24, 0.55)           | 29/22              | 56/6   | 0.04 (0.01, 0.28)           | 0.08              |
| Regular exercise         |                         |         |                             |                    |        |                             |                   |
| No                       | 291/290                 | 173/107 | 0.64 (0.46, 0.88)           | 51/58              | 49/14  | 0.23 (0.09, 0.54)           | 0.03              |
| Yes                      | 308/149                 | 393/45  | 0.20 (0.13, 0.30)           | 48/30              | 80/4   | 0.10 (0.03, 0.35)           | 0.17              |
| Smoking status           |                         |         |                             |                    |        |                             |                   |
| Never                    | 251/195                 | 270/71  | 0.35 (0.24, 0.51)           | 34/35              | 58/13  | 0.25 (0.10, 0.64)           | 0.37              |
| Ever                     | 351/244                 | 299/81  | 0.41 (0.29, 0.58)           | 65/53              | 72/5   | 0.07 (0.02, 0.25)           | 0.006             |
| Alcohol consumption      |                         |         |                             |                    |        |                             |                   |
| Never                    | 163/118                 | 183/51  | 0.52 (0.32, 0.84)           | 28/31              | 45/11  | 0.23 (0.08, 0.63)           | 0.09              |
| Ever                     | 439/321                 | 386/101 | 0.37 (0.28, 0.50)           | 71/57              | 85/7   | 0.08 (0.03, 0.24)           | 0.02              |

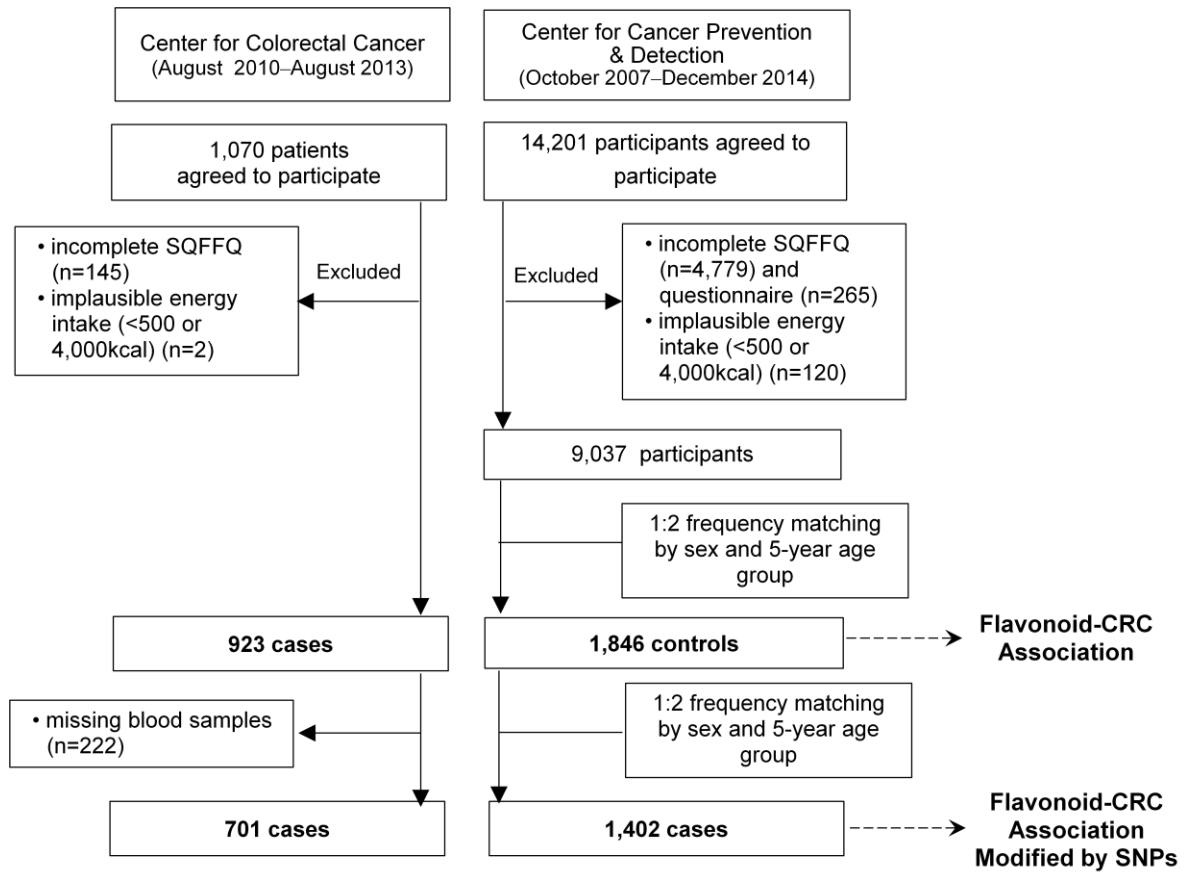

**Supplementary Figure S1.** Flow diagram of the selection of cases and controls
